# Supplementary material for: Designing Relief: A Mixed-Methods Experiment to Inform Crisis Room Design and Intervention in Acute Psychiatric Care
Source: Research Square preprint supplement (doi:10.21203/rs.3.rs-7076311/v1), 2025-08-01
Supplement: Supplementary file 1 [file 12da9d38cdde62f603bc65c0.docx]

**Supplementary Materials**

**Key excerpts from the questionnaire (translated from German)**

The following 5 items were assessed for each of the ten room layouts, which were presented in random order (see main paper for details). The rating format was discussed and refined with the local scientific advisory board of individuals with lived experience (EmPeeRie) of the University Medical Center Hamburg-Eppendorf, Clinic and Policlinic for Psychiatry and Psychotherapy.

**Imagine you are in a state of psychological crisis. You are in the room shown...**

| **1** | What goes through your mind or what do you feel when you see this room? Ideally, name 3 describing words (adjectives) (or just freely associate) |
| --- | --- |
| **2** | How restorative do you find the room overall?  Little/ not restorative  Very restorative |
| **3** | How stressed do you feel by the room overall?  Not stressed at all  Very stressed |
| **4** | How much do you like the room overall?  Don’t like it at all  Like it very much |
| **5** | Does the wall design unsettle, burden, or overwhelm you?  Not at all unsettling/ overwhelming  Very unsettling/ overwhelming |

**Your task:**Please take the deck of room cards and sort the rooms from left to right.
Which room would you prefer if you were in a psychological crisis?
Which one would come second, third, … and which one would be your least preferred?

**@ Experimenter:**Please record the order (enter room codes in the corresponding positions).

@ Versuchsleiter*in: Bitte Reihenfolge notieren (Raum-Codes an entsprechende Stellen eintragen).

| 1  HIGHEST PREFERENCE | 2 | 3 | 4 | 5 | 6 | 7 | 8 | 9 | 10  LOWEST PREFERENCE |
| --- | --- | --- | --- | --- | --- | --- | --- | --- | --- |
|  |  |  |  |  |  |  |  |  |  |

On the following scale, how well were you able to imagine yourself in the situation in the room?
Please mark a point on the line

**0%** I----------------------------------------------------------------------------------------------------I **100%**

***Could not imagine it at all******Could imagine it very well***

**Open Exploration. In your opinion, what should an ideal 'crisis room' or retreat space in a psychiatric ward look like/ offer in order to help you calm down during a psychological crisis?**
What would you need or wish for in such a space?
What might disturb or unsettle you?
What should absolutely be avoided?

**@Experimenter:** Please note down key points; mention **open/shared spaces** to avoid propagating seclusion. Discuss notes with patient to confirm validity.

_____________________________________________________________________________________________________________________________________________________________________________________________________________________________________________________________________________________________________________________________________________________________________________________________________________________________________________________________________________________________________________________________________________

Not reported as part of the main paper and analyses, but formally assessed:

**Rate the participant’s response reliability on a scale from 1 to 5, using the following criteria:**

**1 = Low reliability**
Unclear whether the questions or response format (scale) were understood. A high degree of prompting, structuring questions, or explicit suggestions is required to elicit any response at all. Some items may remain unanswered.

**2 = Rather low reliability**

**3 = Moderate reliability**
Questions were understood independently. The response format (scale) was understood or understood with some support. The traffic light aid may have been used. Occasional clarification or examples (e.g., suggesting adjectives like “fast”) were needed. The participant was generally able to communicate clearly without leading questions or suggestions.

**4 = Rather high reliability**

**5 = High reliability**
The participant clearly understood both the questionnaire and the response format (scale), and was able to express themselves clearly and consistently.

**Reliability: __________________**

*We decided not to exclude any participants based on perceived response reliability, as even seemingly incoherent or inconsistent answers (from our perspective) were considered valuable and reflective of genuine lived experience.

In addition, we collected patient responses regarding the potential implementation of a media wall within the rooms. This included preferences for specific uses, as well as perceived benefits and risks. These data are **not part of the current article or supplement**, but are available upon request from the first author ([l.ascone-michelis@uke.de](mailto:l.ascone-michelis@uke.de)).
