# Supplementary material for: Designing Relief: A Mixed-Methods Experiment to Inform Crisis Room Design and Intervention in Acute Psychiatric Care
Source: Research Square preprint supplement (doi:10.21203/rs.3.rs-7076311/v1), 2025-08-01
Supplement: Supplementary file 2 [file 907b648485c5bba2df6719a7.xlsx]

## Sheet: COMPARE
Referenzlayout	Vergleich mit …
1	2	3	4	5	6	7	8	9	10
2	3	4	5	6	7	8	9	10
3	4	5	6	7	8	9	10
4	5	6	7	8	9	10
5	6	7	8	9	10
6	7	8	9	10
7	8	9	10
8	9	10
9	10
10
Layout-Codes
1	Furnished room - Pine Tree Forest wallpaper
2	Furnished room - King's Chair Cliff at Baltic Sea
3	Furnished room - Oak Tree on a Meadow
4	Furnished Room - Dunes & Baltic Sea
5	Furnished room - River Running through Wilderness
6	Furnished room - Grassfield neaar Mountain with Waterfall
7	Furnished room - green wall
8	Furnished room - blue wall
9	Furnished room - beige/grey walls
10	Empty control room - white walls (traditional psychiatric concept of low stimulation)

## Sheet: pairwise_NPARcompare_rest
Pair	p-value	rank	p-adj (FDR)
Restfulness_Control_C0 - Restfulness_Layout_8	7.13114e-05	1	0.00320901
Restfulness_Control_C0 - Restfulness_Layout_4	7.98722e-05	2	0.00179712
Restfulness_Control_C0 - Restfulness_Layout_7	9.70725e-05	3	0.00145609
Restfulness_Control_C0 - Restfulness_Layout_2	0.000297565	4	0.0033476
Restfulness_Control_C0 - Restfulness_Layout_3	0.000352615	5	0.00317354
Restfulness_Control_C0 - Restfulness_Layout_1	0.000852656	6	0.00639492
Restfulness_Layout_9 - Restfulness_Layout_8	0.00223496	7	0.0143676
Restfulness_Control_C0 - Restfulness_Layout_6	0.00231902	8	0.0130445
Restfulness_Control_C0 - Restfulness_Layout_9	0.00378901	9	0.0189451
Restfulness_Layout_9 - Restfulness_Layout_7	0.00648752	10	0.0291938
Restfulness_Layout_5 - Restfulness_Layout_4	0.0112166	11	0.0458861
Restfulness_Control_C0 - Restfulness_Layout_5	0.0114919	12	0.0430947
Restfulness_Layout_8 - Restfulness_Layout_5	0.0144219	13	0.049922
Restfulness_Layout_9 - Restfulness_Layout_4	0.0193524	14	0.062204
Restfulness_Layout_5 - Restfulness_Layout_2	0.0200949	15	0.0602848
Restfulness_Layout_5 - Restfulness_Layout_3	0.0346928	16	0.0975735
Restfulness_Layout_6 - Restfulness_Layout_4	0.0347628	17	0.0920191
Restfulness_Layout_9 - Restfulness_Layout_3	0.0369877	18	0.0924693
Restfulness_Layout_9 - Restfulness_Layout_2	0.0690338	19	0.163501
Restfulness_Layout_5 - Restfulness_Layout_1	0.0744951	20	0.167614
Restfulness_Layout_9 - Restfulness_Layout_1	0.0956891	21	0.205048
Restfulness_Layout_7 - Restfulness_Layout_5	0.125062	22	0.255809
Restfulness_Layout_8 - Restfulness_Layout_6	0.143466	23	0.280695
Restfulness_Layout_6 - Restfulness_Layout_5	0.166997	24	0.31312
Restfulness_Layout_9 - Restfulness_Layout_6	0.188668	25	0.339602
Restfulness_Layout_6 - Restfulness_Layout_2	0.24908	26	0.431101
Restfulness_Layout_4 - Restfulness_Layout_1	0.28102	27	0.468367
Restfulness_Layout_7 - Restfulness_Layout_4	0.28667	28	0.46072
Restfulness_Layout_8 - Restfulness_Layout_7	0.289155	29	0.448689
Restfulness_Layout_4 - Restfulness_Layout_3	0.301998	30	0.452998
Restfulness_Layout_8 - Restfulness_Layout_1	0.306465	31	0.444868
Restfulness_Layout_6 - Restfulness_Layout_1	0.308283	32	0.433523
Restfulness_Layout_8 - Restfulness_Layout_3	0.419871	33	0.572551
Restfulness_Layout_7 - Restfulness_Layout_6	0.442841	34	0.586113
Restfulness_Layout_4 - Restfulness_Layout_2	0.453414	35	0.582961
Restfulness_Layout_6 - Restfulness_Layout_3	0.465914	36	0.582393
Restfulness_Layout_8 - Restfulness_Layout_2	0.547247	37	0.665571
Restfulness_Layout_9 - Restfulness_Layout_5	0.705073	38	0.834954
Restfulness_Layout_2 - Restfulness_Layout_1	0.714396	39	0.824303
Restfulness_Layout_3 - Restfulness_Layout_1	0.737045	40	0.829176
Restfulness_Layout_8 - Restfulness_Layout_4	0.751395	41	0.824701
Restfulness_Layout_7 - Restfulness_Layout_3	0.762346	42	0.8168
Restfulness_Layout_7 - Restfulness_Layout_2	0.809292	43	0.846934
Restfulness_Layout_7 - Restfulness_Layout_1	0.827465	44	0.846271
Restfulness_Layout_3 - Restfulness_Layout_2	0.919085	45	0.919085

## Sheet: descriptive_rest
Layout	mean	SD	median		ID	1	2	3	4	5	6	7	8	9	10
1	3.8	2.09103	4.5		mean	3.8	3.86667	3.93333	4.26667	3.06667	3.5	3.83333	4.26667	2.86667	1.56667
2	3.86667	1.96053	4		SD	2.09103	1.96053	1.99885	1.79911	2.11617	2.14556	1.70361	1.68017	1.96053	1.97717
3	3.93333	1.99885	4.5
4	4.26667	1.79911	5
5	3.06667	2.11617	3
6	3.5	2.14556	4
7	3.83333	1.70361	1
8	4.26667	1.68017	4.5
9	2.86667	1.96053	3
10	1.56667	1.97717	1
Layout-Codes
1	Furnished room - Pine Tree Forest wallpaper
2	Furnished room - King's Chair Cliff at Baltic Sea
3	Furnished room - Oak Tree on a Meadow
4	Furnished Room - Dunes & Baltic Sea
5	Furnished room - River Running through Wilderness
6	Furnished room - Grassfield neaar Mountain with Waterfall
7	Furnished room - green wall
8	Furnished room - blue wall
9	Furnished room - beige/grey walls
10	Empty control room - white walls (traditional psychiatric concept of low stimulation)

## Sheet: pairwise_NPARcompare_stress
Pair	p-value	rank	p-adj (FDR)
Stressfullness_Control_C0 - Stressfullness_Layout_8	8.09175e-05	1	0.00364129
Stressfullness_Control_C0 - Stressfullness_Layout_4	0.000127759	2	0.00287458
Stressfullness_Control_C0 - Stressfullness_Layout_7	0.000132744	3	0.00199117
Stressfullness_Control_C0 - Stressfullness_Layout_9	0.000823816	4	0.00926793
Stressfullness_Control_C0 - Stressfullness_Layout_3	0.00109	5	0.00980997
Stressfullness_Control_C0 - Stressfullness_Layout_1	0.00132934	6	0.00997007
Stressfullness_Layout_5 - Stressfullness_Layout_4	0.00209762	7	0.0134847
Stressfullness_Control_C0 - Stressfullness_Layout_2	0.00569562	8	0.0320378
Stressfullness_Layout_9 - Stressfullness_Layout_8	0.00632833	9	0.0316416
Stressfullness_Layout_8 - Stressfullness_Layout_5	0.00792582	10	0.0356662
Stressfullness_Layout_5 - Stressfullness_Layout_3	0.00975827	11	0.0399202
Stressfullness_Layout_9 - Stressfullness_Layout_4	0.0145577	12	0.0545913
Stressfullness_Layout_6 - Stressfullness_Layout_4	0.0199698	13	0.0691262
Stressfullness_Layout_9 - Stressfullness_Layout_7	0.0203289	14	0.0653429
Stressfullness_Control_C0 - Stressfullness_Layout_6	0.0211286	15	0.0633857
Stressfullness_Layout_5 - Stressfulness_Layout_1	0.028072	16	0.0789525
Stressfullness_Layout_7 - Stressfullness_Layout_5	0.036422	17	0.0964111
Stressfullness_Layout_5 - Stressfullness_Layout_2	0.07398	18	0.18495
Stressfullness_Layout_8 - Stressfullness_Layout_6	0.090004	19	0.213167
Stressfullness_Layout_4 - Stressfullness_Layout_2	0.0997377	20	0.22441
Stressfullness_Layout_7 - Stressfullness_Layout_6	0.127086	21	0.272327
Stressfullness_Layout_4 - Stressfulness_Layout_1	0.146584	22	0.299831
Stressfullness_Control_C0 - Stressfullness_Layout_5	0.155389	23	0.304022
Stressfullness_Layout_9 - Stressfullness_Layout_3	0.161975	24	0.303703
Stressfullness_Layout_6 - Stressfulness_Layout_1	0.169444	25	0.304999
Stressfullness_Layout_6 - Stressfullness_Layout_5	0.181554	26	0.314227
Stressfullness_Layout_6 - Stressfullness_Layout_3	0.197149	27	0.328582
Stressfullness_Layout_8 - Stressfullness_Layout_2	0.197327	28	0.317132
Stressfullness_Layout_9 - Stressfulness_Layout_1	0.253505	29	0.39337
Stressfullness_Layout_4 - Stressfullness_Layout_3	0.27411	30	0.411165
Stressfullness_Layout_8 - Stressfulness_Layout_1	0.283698	31	0.411819
Stressfullness_Layout_9 - Stressfullness_Layout_2	0.372364	32	0.523636
Stressfullness_Layout_8 - Stressfullness_Layout_3	0.406409	33	0.554195
Stressfullness_Layout_7 - Stressfullness_Layout_2	0.425003	34	0.562505
Stressfullness_Layout_7 - Stressfullness_Layout_4	0.440718	35	0.566637
Stressfullness_Layout_6 - Stressfullness_Layout_2	0.51401	36	0.642513
Stressfullness_Layout_7 - Stressfulness_Layout_1	0.548955	37	0.667648
Stressfullness_Layout_9 - Stressfullness_Layout_5	0.551621	38	0.653235
Stressfullness_Layout_8 - Stressfullness_Layout_7	0.585061	39	0.675071
Stressfullness_Layout_3 - Stressfullness_Layout_2	0.598077	40	0.672836
Stressfullness_Layout_9 - Stressfullness_Layout_6	0.602638	41	0.661432
Stressfullness_Layout_2 - Stressfulness_Layout_1	0.720974	42	0.772472
Stressfullness_Layout_3 - Stressfulness_Layout_1	0.777873	43	0.814054
Stressfullness_Layout_7 - Stressfullness_Layout_3	0.806826	44	0.825163
Stressfullness_Layout_8 - Stressfullness_Layout_4	0.882233	45	0.882233

## Sheet: descriptives_stress
Layout	mean	SD	median		ID	1	2	3	4	5	6	7	8	9	10
1	2.06667	2.09981	1		mean	2.06667	2.26667	1.96667	1.53333	3.06667	2.53333	1.83333	1.6	2.66667	3.93333
2	2.26667	2.21178	2		SD	2.09981	2.21178	2.00832	1.6344	2.24274	2.27025	1.94906	1.61031	1.98847	2.1324
3	1.96667	2.00832	1
4	1.53333	1.6344	1
5	3.06667	2.24274	4
6	2.53333	2.27025	2.5
7	1.83333	1.94906	1
8	1.6	1.61031	1
9	2.66667	1.98847	3
10	3.93333	2.1324	5
Layout-Codes
1	Furnished room - Pine Tree Forest wallpaper
2	Furnished room - King's Chair Cliff at Baltic Sea
3	Furnished room - Oak Tree on a Meadow
4	Furnished Room - Dunes & Baltic Sea
5	Furnished room - River Running through Wilderness
6	Furnished room - Grassfield neaar Mountain with Waterfall
7	Furnished room - green wall
8	Furnished room - blue wall
9	Furnished room - beige/grey walls
10	Empty control room - white walls (traditional psychiatric concept of low stimulation)

## Sheet: pairwise_NPARcompare_liking
Pair	p-value	rank	p-adj (FDR)
Liking_Control_C0 - Liking_Layout_8	6.96251e-06	1	0.000313313
Liking_Control_C0 - Liking_Layout_4	1.57145e-05	2	0.000353576
Liking_Control_C0 - Liking_Layout_2	4.67683e-05	3	0.000701524
Liking_Control_C0 - Liking_Layout_7	6.40494e-05	4	0.000720556
Liking_Control_C0 - Liking_Layout_3	0.000135502	5	0.00121952
Liking_Control_C0 - Liking_Layout_1	0.000163594	6	0.00122695
Liking_Layout_9 - Liking_Layout_8	0.00106037	7	0.00681668
Liking_Control_C0 - Liking_Layout_9	0.00111312	8	0.00626129
Liking_Control_C0 - Liking_Layout_6	0.00192527	9	0.00962636
Liking_Layout_9 - Liking_Layout_4	0.0086831	10	0.0390739
Liking_Control_C0 - Liking_Layout_5	0.00910928	11	0.0372652
Liking_Layout_5 - Liking_Layout_4	0.0102894	12	0.0385852
Liking_Layout_9 - Liking_Layout_7	0.010434	13	0.0361175
Liking_Layout_6 - Liking_Layout_4	0.011302	14	0.036328
Liking_Layout_5 - Liking_Layout_1	0.0125484	15	0.0376451
Liking_Layout_8 - Liking_Layout_5	0.0246459	16	0.0693165
Liking_Layout_9 - Liking_Layout_2	0.029792	17	0.0788612
Liking_Layout_9 - Liking_Layout_3	0.0333578	18	0.0833945
Liking_Layout_5 - Liking_Layout_2	0.0362472	19	0.0858485
Liking_Layout_9 - Liking_Layout_1	0.0429638	20	0.0966686
Liking_Layout_5 - Liking_Layout_3	0.0437976	21	0.0938521
Liking_Layout_6 - Liking_Layout_1	0.0463869	22	0.0948823
Liking_Layout_8 - Liking_Layout_6	0.0955126	23	0.186872
Liking_Layout_6 - Liking_Layout_2	0.118383	24	0.221968
Liking_Layout_7 - Liking_Layout_5	0.119765	25	0.215577
Liking_Layout_6 - Liking_Layout_3	0.155653	26	0.269399
Liking_Layout_9 - Liking_Layout_6	0.200821	27	0.334702
Liking_Layout_7 - Liking_Layout_4	0.210854	28	0.338872
Liking_Layout_7 - Liking_Layout_6	0.318057	29	0.493537
Liking_Layout_4 - Liking_Layout_3	0.321633	30	0.48245
Liking_Layout_6 - Liking_Layout_5	0.347723	31	0.50476
Liking_Layout_8 - Liking_Layout_7	0.353441	32	0.497026
Liking_Layout_4 - Liking_Layout_1	0.361853	33	0.493436
Liking_Layout_4 - Liking_Layout_2	0.482636	34	0.638784
Liking_Layout_8 - Liking_Layout_3	0.48977	35	0.629704
Liking_Layout_8 - Liking_Layout_1	0.501126	36	0.626408
Liking_Layout_7 - Liking_Layout_1	0.64448	37	0.783827
Liking_Layout_8 - Liking_Layout_4	0.644663	38	0.763417
Liking_Layout_7 - Liking_Layout_3	0.682925	39	0.78799
Liking_Layout_7 - Liking_Layout_2	0.704105	40	0.792118
Liking_Layout_2 - Liking_Layout_1	0.719534	41	0.789732
Liking_Layout_3 - Liking_Layout_2	0.72985	42	0.781983
Liking_Layout_8 - Liking_Layout_2	0.757805	43	0.793052
Liking_Layout_9 - Liking_Layout_5	0.792206	44	0.810211
Liking_Layout_3 - Liking_Layout_1	0.86456	45	0.86456

## Sheet: descriptives_liking
Layout	mean	SD	median		ID	1	2	3	4	5	6	7	8	9	10
1	3.86667	1.88887	4		mean	3.86667	3.9	3.83333	4.23333	2.9	3.26667	3.76667	4.1	2.76667	1.4
2	3.9	1.97135	4.5		SD	1.88887	1.97135	1.94906	1.77499	2.21826	2.09981	1.75545	1.64736	1.99453	1.73404
3	3.83333	1.94906	4.5
4	4.23333	1.77499	5
5	2.9	2.21826	3
6	3.26667	2.09981	3.5
7	3.76667	1.75545	4
8	4.1	1.64736	4
9	2.76667	1.99453	2.5
10	1.4	1.73404	1
Layout-Codes
1	Furnished room - Pine Tree Forest wallpaper
2	Furnished room - King's Chair Cliff at Baltic Sea
3	Furnished room - Oak Tree on a Meadow
4	Furnished Room - Dunes & Baltic Sea
5	Furnished room - River Running through Wilderness
6	Furnished room - Grassfield neaar Mountain with Waterfall
7	Furnished room - green wall
8	Furnished room - blue wall
9	Furnished room - beige/grey walls
10	Empty control room - white walls (traditional psychiatric concept of low stimulation)

## Sheet: pairwise_NPARcompare_overwhelm
Pair	p-value	rank	p-adj (FDR)
Disturbance_Control_C0 - Disturbance_Layout_8	0.000422118	1	0.0189953
Disturbance_Control_C0 - Disturbance_Layout_7	0.00137212	2	0.0308726
Disturbance_Layout_9 - Disturbance_Layout_8	0.00955555	3	0.143333
Disturbance_Control_C0 - Disturbance_Layout_2	0.0123477	4	0.138912
Disturbance_Control_C0 - Disturbance_Layout_3	0.0146903	5	0.132212
Disturbance_Layout_8 - Disturbance_Layout_6	0.0170751	6	0.128063
Disturbance_Layout_8 - Disturbance_Layout_5	0.0289972	7	0.186411
Disturbance_Control_C0 - Disturbance_Layout_4	0.0290824	8	0.163588
Disturbance_Layout_7 - Disturbance_Layout_6	0.0354659	9	0.177329
Disturbance_Layout_9 - Disturbance_Layout_7	0.0433427	10	0.195042
Disturbance_Layout_6 - Disturbance_Layout_2	0.044531	11	0.182172
Disturbance_Layout_6 - Disturbance_Layout_4	0.0542115	12	0.203293
Disturbance_Layout_5 - Disturbance_Layout_3	0.0622941	13	0.215633
Disturbance_Layout_5 - Disturbance_Layout_2	0.0659644	14	0.212029
Disturbance_Layout_8 - Disturbance_Layout_1	0.0687036	15	0.206111
Disturbance_Layout_6 - Disturbance_Layout_3	0.0955164	16	0.26864
Disturbance_Layout_7 - Disturbance_Layout_5	0.105096	17	0.278195
Disturbance_Control_C0 - Disturbance_Layout_1	0.131728	18	0.329319
Disturbance_Layout_3 - Disturbance_Layout_1	0.135208	19	0.320231
Disturbance_Control_C0 - Disturbance_Layout_9	0.137408	20	0.309168
Disturbance_Layout_5 - Disturbance_Layout_4	0.151245	21	0.324096
Disturbance_Layout_2 - Disturbance_Layout_1	0.176698	22	0.361428
Disturbance_Layout_9 - Disturbance_Layout_3	0.183931	23	0.359865
Disturbance_Layout_7 - Disturbance_Layout_1	0.197341	24	0.370015
Disturbance_Layout_9 - Disturbance_Layout_2	0.1997	25	0.359461
Disturbance_Layout_4 - Disturbance_Layout_1	0.291729	26	0.504915
Disturbance_Layout_9 - Disturbance_Layout_4	0.32229	27	0.53715
Disturbance_Control_C0 - Disturbance_Layout_6	0.329129	28	0.528957
Disturbance_Layout_8 - Disturbance_Layout_4	0.383551	29	0.595165
Disturbance_Layout_8 - Disturbance_Layout_7	0.427273	30	0.640909
Disturbance_Layout_8 - Disturbance_Layout_3	0.430128	31	0.624379
Disturbance_Layout_8 - Disturbance_Layout_2	0.451244	32	0.634561
Disturbance_Layout_6 - Disturbance_Layout_1	0.455699	33	0.621408
Disturbance_Layout_5 - Disturbance_Layout_1	0.472873	34	0.625862
Disturbance_Control_C0 - Disturbance_Layout_5	0.49854	35	0.64098
Disturbance_Layout_7 - Disturbance_Layout_4	0.598524	36	0.748155
Disturbance_Layout_7 - Disturbance_Layout_3	0.715364	37	0.870038
Disturbance_Layout_7 - Disturbance_Layout_2	0.782428	38	0.92656
Disturbance_Layout_9 - Disturbance_Layout_6	0.818515	39	0.94444
Disturbance_Layout_9 - Disturbance_Layout_1	0.819531	40	0.921973
Disturbance_Layout_9 - Disturbance_Layout_5	0.832003	41	0.913174
Disturbance_Layout_4 - Disturbance_Layout_2	0.843637	42	0.903897
Disturbance_Layout_6 - Disturbance_Layout_5	0.860673	43	0.900705
Disturbance_Layout_3 - Disturbance_Layout_2	0.92525	44	0.946278
Disturbance_Layout_4 - Disturbance_Layout_3	0.97	45	0.97

## Sheet: desriptives_overwhelm
Layout	mean	SD	median		ID	1	2	3	4	5	6	7	8	9	10
1	2.5	2.22447	2		mean	2.5	1.9	1.9	2	2.86207	2.76667	1.76667	1.5	2.63333	3.33333
2	1.9	2.00603	1.5		SD	2.22447	2.00603	2.05695	2.11725	2.31029	2.20788	2.06253	1.88917	2.31164	2.24888
3	1.9	2.05695	1.5
4	2	2.11725	1
5	2.86207	2.31029	3
6	2.76667	2.20788	3
7	1.76667	2.06253	1
8	1.5	1.88917	0
9	2.63333	2.31164	3
10	3.33333	2.24888	4
Layout-Codes
1	Furnished room - Pine Tree Forest wallpaper
2	Furnished room - King's Chair Cliff at Baltic Sea
3	Furnished room - Oak Tree on a Meadow
4	Furnished Room - Dunes & Baltic Sea
5	Furnished room - River Running through Wilderness
6	Furnished room - Grassfield neaar Mountain with Waterfall
7	Furnished room - green wall
8	Furnished room - blue wall
9	Furnished room - beige/grey walls
10	Empty control room - white walls (traditional psychiatric concept of low stimulation)

## Sheet: pairwise_NPARcompare_rank
Paar	p-Wert	rank	p-adj
Control_C0_Rank - Layout_8_Rank	4.10527e-06	1	0.000184737
Control_C0_Rank - Layout_7_Rank	6.4279e-06	2	0.000144628
Control_C0_Rank - Layout_4_Rank	4.87834e-05	3	0.000731751
Control_C0_Rank - Layout_2_Rank	0.00010968	4	0.0012339
Control_C0_Rank - Layout_3_Rank	0.000165911	5	0.0014932
Layout_9_Rank - Layout_7_Rank	0.000186811	6	0.00140108
Layout_9_Rank - Layout_8_Rank	0.000271827	7	0.00174746
Control_C0_Rank - Layout_6_Rank	0.000293547	8	0.0016512
Layout_9_Rank - Layout_4_Rank	0.000304594	9	0.00152297
Layout_9_Rank - Layout_2_Rank	0.000405966	10	0.00182685
Control_C0_Rank - Layout_5_Rank	0.00056756	11	0.00232184
Layout_9_Rank - Layout_3_Rank	0.000981445	12	0.00368042
Control_C0_Rank - Layout_9_Rank	0.00106093	13	0.00367246
Control_C0_Rank - Layout_1_Rank	0.00110322	14	0.00354606
Layout_4_Rank - Layout_1_Rank	0.00702381	15	0.0210714
Layout_5_Rank - Layout_4_Rank	0.00734233	16	0.0206503
Layout_9_Rank - Layout_6_Rank	0.0112342	17	0.0297375
Layout_5_Rank - Layout_3_Rank	0.0155485	18	0.0388713
Layout_9_Rank - Layout_5_Rank	0.0243607	19	0.0576965
Layout_9_Rank - Layout_1_Rank	0.0308824	20	0.0694853
Layout_5_Rank - Layout_2_Rank	0.045207	21	0.0968722
Layout_3_Rank - Layout_1_Rank	0.0711627	22	0.14556
Layout_6_Rank - Layout_5_Rank	0.107038	23	0.209423
Layout_6_Rank - Layout_4_Rank	0.114866	24	0.215374
Layout_6_Rank - Layout_3_Rank	0.150599	25	0.271079
Layout_8_Rank - Layout_5_Rank	0.161395	26	0.279337
Layout_7_Rank - Layout_5_Rank	0.21196	27	0.353266
Layout_5_Rank - Layout_1_Rank	0.263096	28	0.422833
Layout_7_Rank - Layout_4_Rank	0.273058	29	0.423711
Layout_4_Rank - Layout_2_Rank	0.295066	30	0.4426
Layout_8_Rank - Layout_4_Rank	0.323768	31	0.469986
Layout_7_Rank - Layout_3_Rank	0.339919	32	0.478011
Layout_8_Rank - Layout_3_Rank	0.350979	33	0.478608
Layout_2_Rank - Layout_1_Rank	0.361461	34	0.478404
Layout_6_Rank - Layout_1_Rank	0.569683	35	0.73245
Layout_3_Rank - Layout_2_Rank	0.594228	36	0.742785
Layout_6_Rank - Layout_2_Rank	0.616992	37	0.750396
Layout_8_Rank - Layout_1_Rank	0.672807	38	0.796745
Layout_7_Rank - Layout_1_Rank	0.687949	39	0.793787
Layout_4_Rank - Layout_3_Rank	0.6957	40	0.782663
Layout_7_Rank - Layout_2_Rank	0.728433	41	0.799499
Layout_8_Rank - Layout_2_Rank	0.744802	42	0.798002
Layout_8_Rank - Layout_7_Rank	0.789191	43	0.825898
Layout_8_Rank - Layout_6_Rank	0.896393	44	0.916765
Layout_7_Rank - Layout_6_Rank	0.974034	45	0.974034

[truncated: 2 more sheets: descriptives_rank, All_Rating_Dimensions]
